# Supplementary material for: Feeding Pre-weaned Calves With Waste Milk Containing Antibiotic Residues Is Related to a Higher Incidence of Diarrhea and Alterations in the Fecal Microbiota
Source: Front Vet Sci. 2021 Jul 8;8:650150. doi: 10.3389/fvets.2021.650150 (PMC8298036; doi:10.3389/fvets.2021.650150)
Supplement: Supplementary Table 1 — Average number of sequences per treatment and time point. [file Table_1.XLSX]

## Sheet: Table_S1
	timepoint	N	NM	WM
n. sequences	T1	6	61592 +/-33344	74428 +/-43110
	T2	6	97989 +/-27237	76008 +/-27740
	T3	6	91951 +/-60080	73641 +/-41454
	T4	6	139889 +/-94526	76604 +/-49691
	T5	6	101748 +/-73122	80236 +/-29220
	T6	6	95741 +/-54542	81222 +/-31716
retention rate	T1	6	0.7989	0.8306
	T2	6	0.7807	0.7973
	T3	6	0.8085	0.8149
	T4	6	0.8277	0.8208
	T5	6	0.8222	0.8155
	T6	6	0.8151	0.8255
